# Supplementary material
Source: PubMed Central journal article supplement (PMC2938146)
Supplement: pp.110.157651_1.pdf [file pp.110.157651_1.pdf]

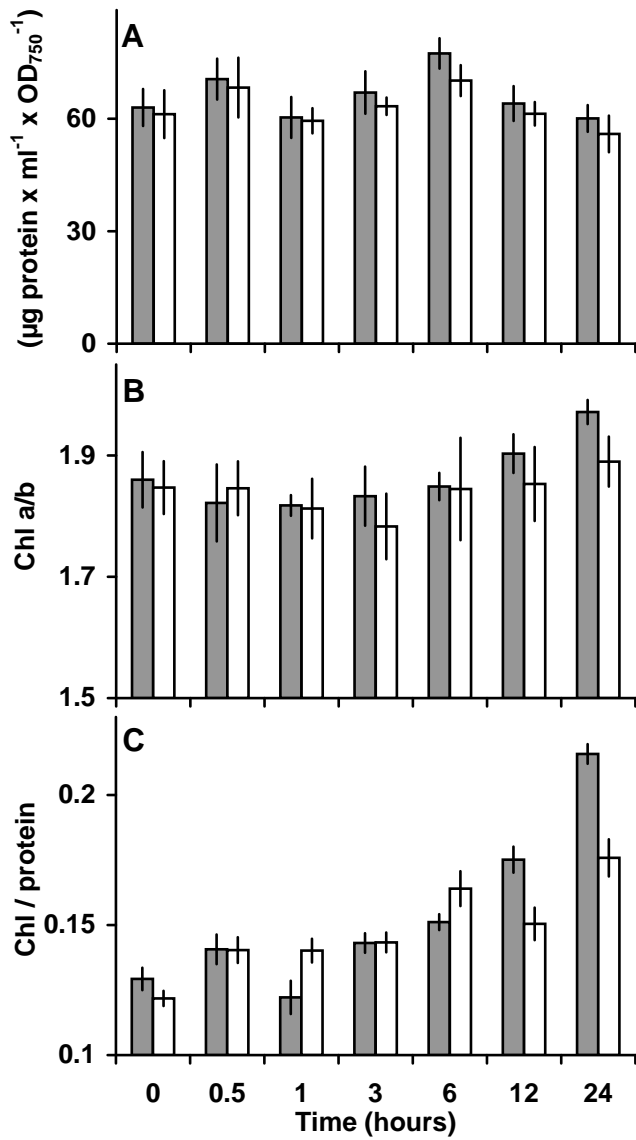

**S. Figure 1.** Time course comparison of CCM induced and control cultures. A, Protein concentrations standardized to OD<sub>750</sub>. B, Chlorophyll a/b ratios. C, Ratio of total chlorophyll per protein concentration. Control culture bubbled with high CO<sub>2</sub> (grey bars) and induced culture bubbled with low CO<sub>2</sub> (white bars). All bars represent the average ± SD of five individual replicates.
