# Supplementary material
Source: PubMed Central journal article supplement (PMC2938146)
Supplement: pp.110.157651_2.pdf [file pp.110.157651_2.pdf]

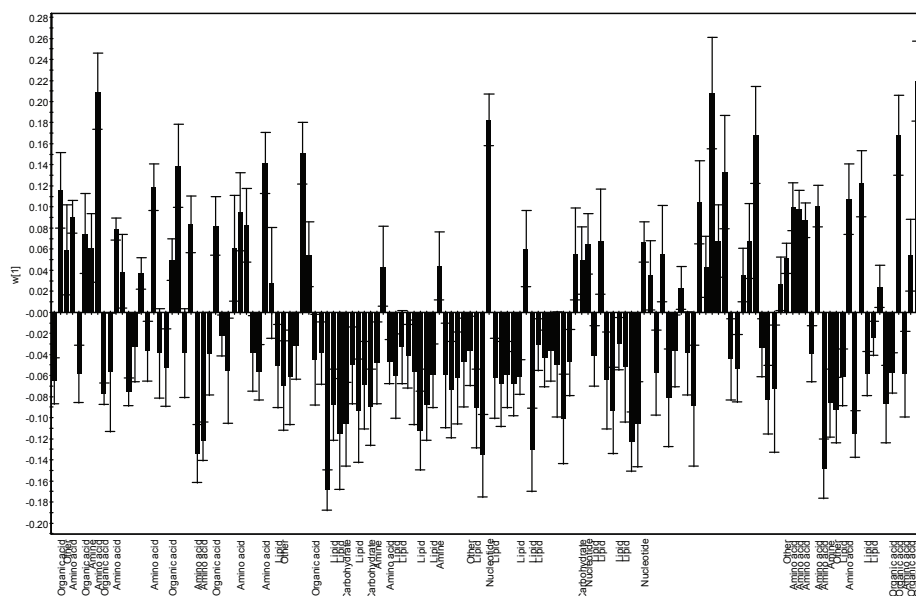

Figure 2\_supplementary. Predictive loadings ( $w$ ) for the significant metabolites between "Low  $\text{CO}_2$ " and "High  $\text{CO}_2$ " samples, at 3h (see Fig. 4 for overview of all detected metabolites). Significantly differing metabolites were detected by interpreting the first weight vector ( $w[1]$ ), as described by (Trygg and Wold, 2002), from the OPLS-DA model described in figure 4, together with the 95% confidence intervals calculated using jack-knifing (Martens and Martens, 2000). Positive values indicate higher concentrations for "Low  $\text{CO}_2$ " samples and negative values indicate higher concentrations for "High  $\text{CO}_2$ " samples. Metabolites are named after compound class. Metabolites not classified are unknown metabolites not possible to classify.

#### References:

**Martens H, Martens M** (2000) Modified Jack-knife estimation of parameter uncertainty in bilinear modelling by partial least squares regression (PLSR). *Food Qual Pref* **11**: 5-16

**Trygg J, Wold S** (2002) Orthogonal projections to latent structures (OPLS). *J Chemometrics* **16**: 119-128
